# Supplementary material
Source: PubMed Central journal article supplement (PMC3956194)
Supplement: 1312693111_pnas.201312693SI.pdf [file 1312693111_pnas.201312693SI.pdf]

# Supporting Information

Parsa et al. 10.1073/pnas.1312693111

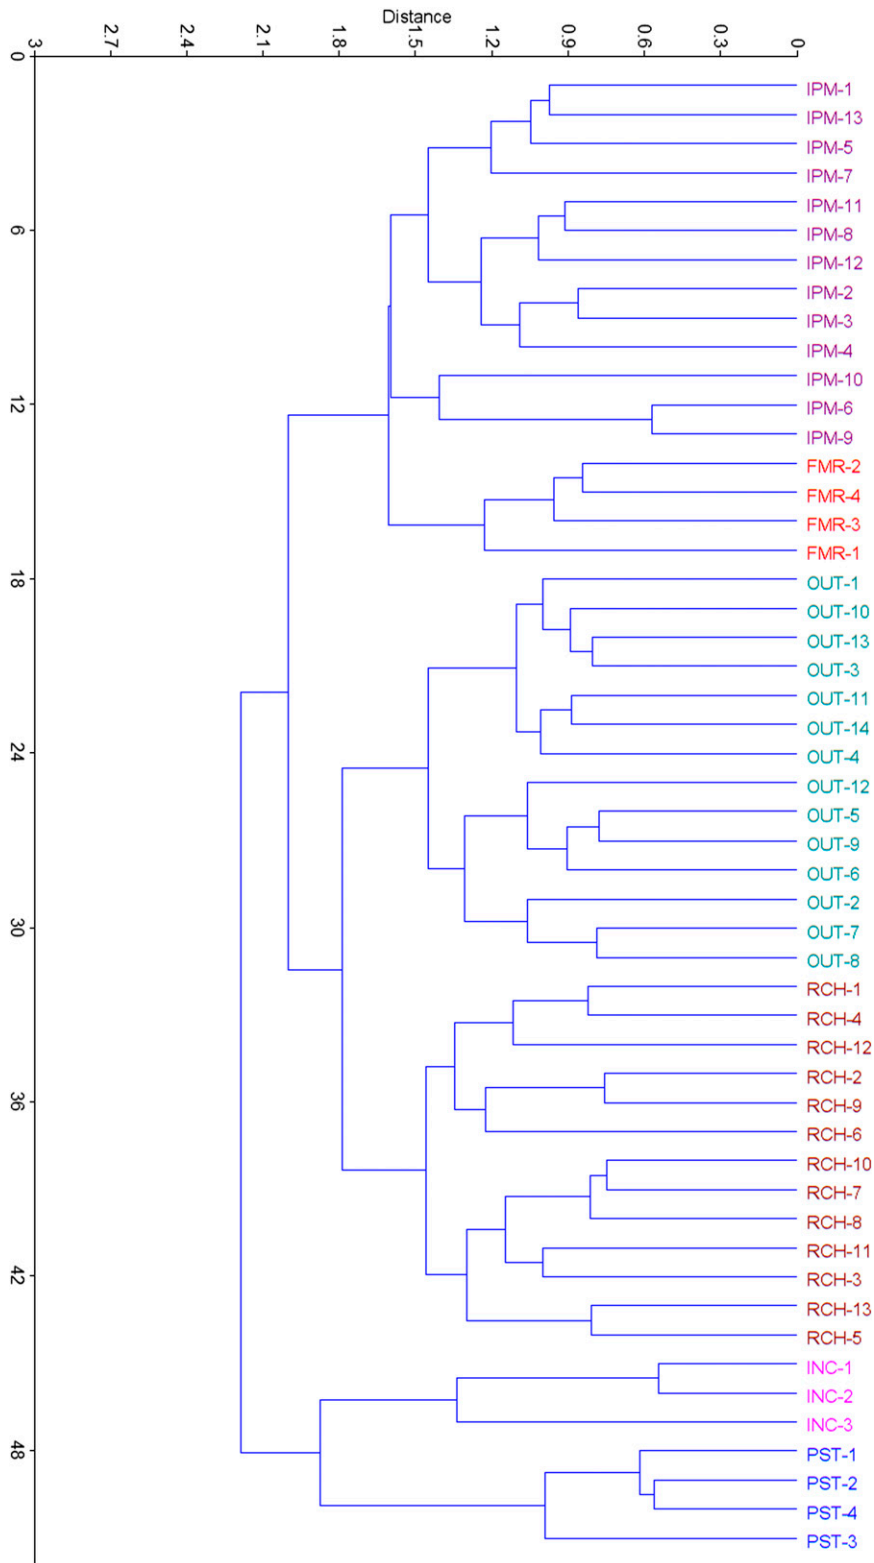

**Fig. S1.** Similarity dendrogram of 51 unique obstacles to integrated pest management (IPM) adoption in developing countries, based on pairwise distances capturing how often the statements were sorted into groups that “belong together” or “share a common theme.”

**Table S1. Characteristics of participants in the brainstorming and rating phases of a concept mapping exercise to identify obstacles to IPM adoption in developing countries**

| Descriptor/category                         | Brainstorming | Rating |
|---------------------------------------------|---------------|--------|
| <b>Region</b>                               |               |        |
| Latin America and Caribbean                 | 129           | 73     |
| Sub-Saharan Africa                          | 97            | 26     |
| High-income countries                       | 84            | 41     |
| South Asia                                  | 50            | 8      |
| East Asia and Pacific                       | 36            | 9      |
| Middle East and North Africa                | 14            | 5      |
| Europe and Central Asia                     | 3             | 1      |
| <b>Sex</b>                                  |               |        |
| Male                                        | 312           | 109    |
| Female                                      | 101           | 54     |
| <b>Education</b>                            |               |        |
| PhD                                         | 213           | 81     |
| Masters                                     | 144           | 58     |
| Undergraduate                               | 41            | 22     |
| Other                                       | 15            | 2      |
| <b>Sector</b>                               |               |        |
| Academia                                    | 125           | 67     |
| Development, nonprofit                      | 111           | 38     |
| Government                                  | 100           | 35     |
| Private, for-profit                         | 45            | 10     |
| Other                                       | 21            | 9      |
| Farmer                                      | 11            | 4      |
| <b>Expertise</b>                            |               |        |
| Entomology                                  | —             | 61     |
| Agronomy                                    | —             | 46     |
| Plant pathology                             | —             | 22     |
| Extension                                   | —             | 13     |
| Other                                       | —             | 10     |
| Economics                                   | —             | 7      |
| Sociology                                   | —             | 3      |
| Anthropology                                | —             | 1      |
| <b>IPM experience in developing country</b> |               |        |
| >10 y                                       | 233           | 92     |
| 1–5 y                                       | 84            | 29     |
| 6–10 y                                      | 71            | 22     |
| None                                        | 25            | 20     |

**Table S2. Statistical differences in ratings by region for 51 obstacles to IPM adoption in developing countries**

| Code*  | Importance |      |      |      |                             | Difficulty |      |      |      |                             |
|--------|------------|------|------|------|-----------------------------|------------|------|------|------|-----------------------------|
|        | HIC        | Asia | LAC  | SSA  | <i>P</i> value <sup>†</sup> | HIC        | Asia | LAC  | SSA  | <i>P</i> value <sup>†</sup> |
| OUT-9  | 3.78       | 3.24 | 3.22 | 3.73 | 0.064                       | 3.34       | 2.53 | 2.51 | 3.12 | 0.001                       |
| OUT-5  | 3.78       | 3.29 | 3.47 | 3.27 | 0.228                       | 3.41       | 2.71 | 2.51 | 2.65 | 0.000                       |
| OUT-2  | 3.76       | 3.06 | 3.23 | 3.54 | 0.363                       | 3.00       | 2.65 | 2.74 | 2.62 | 0.730                       |
| INC-2  | 3.68       | 3.41 | 3.48 | 3.85 | 0.821                       | 3.10       | 3.00 | 3.08 | 3.27 | 0.874                       |
| PST-1  | 3.66       | 3.76 | 3.70 | 3.38 | 0.657                       | 2.80       | 3.18 | 3.56 | 2.73 | 0.001                       |
| OUT-12 | 3.66       | 2.71 | 3.05 | 3.58 | 0.073                       | 3.15       | 2.65 | 2.47 | 2.96 | 0.005                       |
| OUT-1  | 3.61       | 3.29 | 3.29 | 3.62 | 0.310                       | 2.93       | 2.65 | 2.42 | 2.65 | 0.224                       |
| PST-2  | 3.49       | 3.35 | 3.51 | 3.54 | 0.840                       | 3.37       | 2.76 | 3.37 | 2.92 | 0.132                       |
| PST-4  | 3.49       | 3.00 | 3.70 | 3.19 | 0.012                       | 2.98       | 3.00 | 3.32 | 2.92 | 0.047                       |
| RCH-10 | 3.44       | 3.06 | 3.16 | 3.27 | 0.320                       | 3.15       | 2.12 | 2.38 | 2.35 | 0.000                       |
| RCH-7  | 3.44       | 2.65 | 3.00 | 3.62 | 0.080                       | 3.10       | 2.47 | 2.59 | 2.62 | 0.241                       |
| IPM-1  | 3.44       | 2.94 | 3.44 | 3.12 | 0.301                       | 3.00       | 2.94 | 3.03 | 2.69 | 0.783                       |
| OUT-10 | 3.37       | 2.47 | 2.82 | 2.88 | 0.097                       | 2.85       | 2.06 | 2.10 | 2.38 | 0.006                       |
| RCH-1  | 3.37       | 2.82 | 3.23 | 3.50 | 0.151                       | 2.41       | 2.18 | 2.59 | 2.04 | 0.211                       |
| INC-1  | 3.34       | 3.65 | 3.63 | 3.58 | 0.458                       | 2.54       | 3.53 | 2.97 | 2.65 | 0.007                       |
| OUT-6  | 3.32       | 2.88 | 3.40 | 3.19 | 0.147                       | 2.61       | 2.12 | 2.42 | 2.12 | 0.105                       |
| IPM-9  | 3.32       | 3.82 | 3.55 | 3.15 | 0.106                       | 3.20       | 3.35 | 3.05 | 2.73 | 0.306                       |
| OUT-7  | 3.29       | 2.41 | 3.19 | 3.27 | 0.203                       | 2.76       | 1.94 | 2.37 | 2.19 | 0.053                       |
| RCH-11 | 3.29       | 2.29 | 3.22 | 3.12 | 0.018                       | 2.66       | 2.00 | 2.22 | 2.15 | 0.074                       |
| IPM-10 | 3.29       | 2.94 | 2.96 | 3.42 | 0.147                       | 2.78       | 2.35 | 2.40 | 2.85 | 0.224                       |
| OUT-8  | 3.27       | 2.53 | 2.92 | 2.77 | 0.399                       | 2.51       | 2.18 | 2.21 | 2.19 | 0.583                       |
| RCH-12 | 3.22       | 2.47 | 2.95 | 3.31 | 0.062                       | 3.00       | 2.41 | 2.36 | 2.81 | 0.018                       |
| OUT-11 | 3.20       | 3.06 | 3.33 | 3.31 | 0.855                       | 2.61       | 2.24 | 2.47 | 2.54 | 0.834                       |
| IPM-12 | 3.20       | 3.00 | 3.08 | 3.23 | 0.837                       | 3.12       | 2.76 | 2.95 | 3.08 | 0.664                       |
| PST-3  | 3.17       | 3.12 | 3.71 | 3.00 | 0.005                       | 2.80       | 3.06 | 3.29 | 2.50 | 0.006                       |
| IPM-6  | 3.15       | 3.35 | 3.48 | 2.92 | 0.213                       | 2.56       | 3.00 | 3.18 | 2.50 | 0.018                       |
| FMR-3  | 3.15       | 3.06 | 3.52 | 3.35 | 0.044                       | 2.83       | 3.00 | 3.42 | 3.08 | 0.024                       |
| IPM-3  | 3.12       | 3.41 | 4.05 | 3.54 | 0.000                       | 2.83       | 2.71 | 3.11 | 2.73 | 0.085                       |
| IPM-11 | 3.12       | 2.82 | 2.93 | 3.35 | 0.624                       | 2.78       | 2.65 | 2.42 | 2.65 | 0.850                       |
| RCH-2  | 3.12       | 3.18 | 3.26 | 3.12 | 0.666                       | 2.46       | 2.41 | 2.42 | 2.31 | 0.877                       |
| FMR-1  | 3.10       | 2.53 | 2.81 | 3.12 | 0.157                       | 2.85       | 2.88 | 2.92 | 2.96 | 0.848                       |
| RCH-5  | 3.07       | 2.53 | 2.96 | 3.27 | 0.123                       | 2.49       | 1.71 | 2.19 | 2.19 | 0.047                       |
| RCH-9  | 3.07       | 2.24 | 2.84 | 2.69 | 0.101                       | 2.02       | 1.82 | 2.27 | 2.04 | 0.392                       |
| IPM-2  | 3.07       | 2.88 | 2.93 | 3.04 | 0.826                       | 2.83       | 2.76 | 2.45 | 2.54 | 0.208                       |
| IPM-13 | 3.05       | 3.00 | 3.32 | 2.65 | 0.194                       | 2.85       | 2.88 | 3.08 | 2.54 | 0.234                       |
| INC-3  | 3.05       | 3.00 | 3.48 | 2.88 | 0.049                       | 2.63       | 2.76 | 2.96 | 2.62 | 0.045                       |
| OUT-13 | 3.02       | 2.24 | 2.89 | 3.23 | 0.046                       | 2.71       | 1.82 | 2.19 | 2.54 | 0.015                       |
| OUT-3  | 3.02       | 2.53 | 2.92 | 3.12 | 0.441                       | 2.56       | 1.76 | 2.15 | 2.19 | 0.020                       |
| RCH-4  | 3.02       | 3.12 | 3.26 | 3.15 | 0.576                       | 2.32       | 2.47 | 2.40 | 2.31 | 0.733                       |
| IPM-4  | 3.00       | 2.29 | 2.66 | 2.85 | 0.075                       | 2.76       | 2.12 | 2.68 | 2.50 | 0.232                       |
| IPM-5  | 3.00       | 3.71 | 3.49 | 3.42 | 0.011                       | 2.85       | 3.18 | 3.10 | 2.65 | 0.369                       |
| FMR-4  | 2.98       | 3.00 | 3.27 | 3.00 | 0.453                       | 2.61       | 2.18 | 2.47 | 2.46 | 0.386                       |
| FMR-2  | 2.93       | 3.24 | 3.44 | 2.65 | 0.028                       | 2.49       | 3.00 | 3.00 | 2.50 | 0.028                       |
| IPM-7  | 2.88       | 3.06 | 3.07 | 3.08 | 0.978                       | 2.20       | 2.71 | 2.78 | 2.65 | 0.139                       |
| RCH-8  | 2.88       | 2.65 | 2.85 | 2.92 | 0.942                       | 2.61       | 2.47 | 2.32 | 2.35 | 0.627                       |
| RCH-6  | 2.85       | 2.82 | 2.96 | 2.62 | 0.770                       | 2.51       | 1.94 | 2.10 | 2.12 | 0.024                       |
| RCH-13 | 2.85       | 2.06 | 2.48 | 2.73 | 0.115                       | 2.61       | 2.29 | 2.45 | 2.08 | 0.263                       |
| OUT-4  | 2.78       | 1.76 | 2.33 | 2.42 | 0.024                       | 2.10       | 1.94 | 1.92 | 2.04 | 0.820                       |
| IPM-8  | 2.73       | 2.24 | 2.74 | 3.00 | 0.147                       | 2.54       | 2.06 | 2.63 | 2.12 | 0.030                       |
| RCH-3  | 2.66       | 3.29 | 3.07 | 3.15 | 0.195                       | 2.34       | 2.59 | 2.11 | 2.08 | 0.172                       |
| OUT-14 | 2.51       | 2.35 | 2.89 | 3.08 | 0.128                       | 2.63       | 2.24 | 2.47 | 2.85 | 0.243                       |

HIC, high-income countries; LAC, Latin America and the Caribbean; SSA, sub-Saharan Africa.

\*The statistical significance of the importance and difficulty of an obstacle according to rating by region was derived through multiple regression analyses using sex, education and field of expertise as covariates. Larger *P* values suggest greater agreement across regions.

<sup>†</sup>The letter coding describes six obstacle themes: FMR, farmer weaknesses; INC, weak adoption incentives; IPM, IPM weaknesses; OUT, outreach weaknesses; PST, pesticide industry interference; RCH, research weaknesses. Numbers refer to specific obstacles.
